# Supplementary material for: Could Dietary Goals and Climate Change Mitigation Be Achieved Through Optimized Diet? The Experience of Modeling the National Food Consumption Data in Italy
Source: PubMed Central journal article supplement (PMC7212824; doi:10.3389/fnut.2020.00048), 2020-05-04
Supplement: Data_Sheet_2.pdf [file Data_Sheet_2.pdf]

| <b>Appendix 2 - Literature references used for GHGE data points of indicator products</b> |                          |                                                                                                |                            |                                                                                                                                                                                                                                       |                            |                          |
|-------------------------------------------------------------------------------------------|--------------------------|------------------------------------------------------------------------------------------------|----------------------------|---------------------------------------------------------------------------------------------------------------------------------------------------------------------------------------------------------------------------------------|----------------------------|--------------------------|
| <b>n</b>                                                                                  | <b>Indicator product</b> | <b>Authors</b>                                                                                 | <b>Year of Publication</b> | <b>Journal</b>                                                                                                                                                                                                                        | <b>Type of publication</b> | <b>Analysis location</b> |
| <b>1</b>                                                                                  | <b>Bread</b>             | Espinoza-Orias N, Stichnothe H, Azapagic A                                                     | 2011                       | The International Journal of Life Cycle Assessment                                                                                                                                                                                    | Scientific paper           | United Kingdom           |
|                                                                                           |                          | Korsaeth A, Jacobsen AZ, Roer AG, Henriksen TM, Sonesson U, Bonesmo H, Skjelvåg AO, Strømman A | 2012                       | Acta Agriculturae Scandinavica, Section A — Animal Science                                                                                                                                                                            | Scientific paper           | Norway                   |
| <b>2</b>                                                                                  | <b>Wheat flour</b>       | Fantin V, Rondini I, Righi S, Pasteris A, Coatti F, Passerini F, Masoni P                      | 2015                       | Proceedings of the International conference on Life Cycle Assessment as reference methodology for assessing supply chains and supporting global sustainability challenge - LCA for “Feeding the planet and energy for life” EXPO 2015 | Conference paper           | Italy                    |
|                                                                                           |                          | Ruini L, Ferrari E, Meriggi P, Marino M, Sessa S, Principato L                                 | 2013                       | Agriregionieuropa                                                                                                                                                                                                                     | Report                     | Italy                    |
|                                                                                           |                          | Castaldi S, Fidaleo M, Moresi M, Valentini R                                                   | 2009                       | University of Tuscia, Italy                                                                                                                                                                                                           | Report                     | Italy                    |
| <b>3</b>                                                                                  | <b>Mais</b>              | Fantin V, Rondini I, Righi S, Pasteris A, Coatti F, Passerini F, Masoni P                      | 2015                       | Proceedings of the International conference on Life Cycle Assessment as reference methodology for assessing supply chains and supporting global sustainability challenge - LCA for “Feeding the planet and energy for life” EXPO 2015 | Conference paper           | Italy                    |
| <b>4</b>                                                                                  | <b>Barley</b>            | Rajaniemi M, Mikkola H, Ahokas J                                                               | 2011                       | Agronomy Research                                                                                                                                                                                                                     | Scientific paper           | Finland                  |
| <b>5</b>                                                                                  | <b>Oat</b>               | Rajaniemi M, Mikkola H, Ahokas J                                                               | 2011                       | Agronomy Research                                                                                                                                                                                                                     | Scientific paper           | Finland                  |
| <b>6</b>                                                                                  | <b>Millet</b>            | Audsley E, Brander M, Chatterton J, Murphy-Bokern D, Webster C, Williams A                     | 2009                       | WWF-UK                                                                                                                                                                                                                                | Report                     | United Kingdom           |

|    |                      |                                                                |      |                                                    |                  |                |
|----|----------------------|----------------------------------------------------------------|------|----------------------------------------------------|------------------|----------------|
| 7  | Breakfast cereal     | Jeswani HK, Burkinshaw R, Azapagic A                           | 2015 | Sustainable production and consumption             | Scientific paper | United Kingdom |
|    |                      | Ma BL, Liang, BC, Biswas DK.                                   | 2012 | Nutrient Cycling in Agroecosystems                 | Scientific paper | Canada         |
| 8  | Pizza                | National Footprint Account                                     | 2008 | Global Footprint Network                           | Report           | Italy          |
| 9  | Pasta with egg       | Ministry of the Environment and Protection of Land and Sea     | 2013 | National programme for carbon footprint assessment | Report           | Italy          |
| 10 | Pasta                | Ruini L, Ferrari E, Meriggi P, Marino M, Sessa F, Principato L | 2013 | Agriregionieuropa                                  | Scientific paper | Italy          |
|    |                      | Ministry of the Environment and Protection of Land and Sea     | 2015 | National programme for carbon footprint assessment | Report           | Italy          |
|    |                      | Ministry of the Environment and Protection of Land and Sea     | 2011 | National programme for carbon footprint assessment | Report           | Italy          |
|    |                      | Ministry of the Environment and Protection of Land and Sea     | 2014 | National programme for carbon footprint assessment | Report           | Italy          |
|    |                      | Voiello, Registration number S-P 00491                         | 2014 | Environmental declaration                          | Technical sheet  | Italy          |
| 11 | Rice                 | Blengini GA, Busto M                                           | 2009 | Journal of Environmental Management                | Scientific paper | Italy          |
| 12 | Biscuits             | Barilla, Registration number S-P 00421                         | 2005 | Environmental declaration                          | Technical sheet  | Italy          |
|    |                      | Barilla, Registration number S-P-00324                         | 2012 | Environmental declaration                          | Technical sheet  | Italy          |
|    |                      | Barilla, Registration number S-P 00485                         | 2013 | Environmental declaration                          | Technical sheet  | Italy          |
|    |                      | Barilla, Registration number S-P-00230                         | 2012 | Environmental declaration                          | Technical sheet  | Italy          |
|    |                      | Barilla, Registration number S-P 00416                         | 2013 | Environmental declaration                          | Technical sheet  | Italy          |
|    |                      | Castaldi S, Fidaleo M, Moresi M, Valentini R                   | 2009 | University of Tuscia. Italy                        | Report           | Italy          |
| 13 | Snack cake           | National Footprint Account                                     | 2008 | Global Footprint Network                           | Report           | Italy          |
| 14 | Croissant with cream | Barilla, Registration number S-P-00319                         | 2012 | Environmental declaration                          | Technical sheet  | Italy          |
| 15 | Croissant with jam   | Barilla, Registration number S-P-00330                         | 2012 | Environmental declaration                          | Technical sheet  | Italy          |
| 16 | Crackers             | Barilla, Registration number S-P-00229                         | 2013 | Environmental declaration                          | Technical sheet  | Italy          |
|    |                      | Barilla, Registration number S-P-00225                         | 2013 | Environmental declaration                          | Technical sheet  | Italy          |
|    |                      | Barilla, Registration number S-P-00331                         | 2012 | Environmental declaration                          | Technical sheet  | Italy          |
|    |                      | Barilla, Registration number S-P-00226                         | 2013 | Environmental declaration                          | Technical sheet  | Italy          |

|    |                 |                                                                                                                                               |      |                                                                    |                  |                 |
|----|-----------------|-----------------------------------------------------------------------------------------------------------------------------------------------|------|--------------------------------------------------------------------|------------------|-----------------|
| 17 | Green bean      | National Footprint Account                                                                                                                    | 2008 | Global Footprint Network                                           | Report           | Italy           |
| 18 | Dried legumes   | Fuentes C, Carlsson-Kanyama A, Biel A, Bergström K, Carlsson-Kanyama A, Fuentes C, Grankvist G, Lagerberg G, Fogelberg C, Shanahan H, Solér C | 2006 | Environ Management                                                 | Scientific paper | United Kingdom  |
| 19 | Chicory         | Tamburini E, Pedrini P, Marchetti G, Fano EA, Castaldelli G                                                                                   | 2015 | Sustainability                                                     | Scientific paper | Italy           |
| 20 | Lettuce         | Bartzas G, Zaharaki D, Komnitsas K                                                                                                            | 2015 | Information processing in agriculture                              | Scientific paper | Italy and Spain |
|    |                 | Castaldi S, Fidaleo M, Moresi M, Valentini R.                                                                                                 | 2009 | University of Tuscia. Italy                                        | Report           | Italy           |
| 21 | Carrots         | Castaldi S, Fidaleo M, Moresi M, Valentini R                                                                                                  | 2009 | University of Tuscia. Italy                                        | Report           | Italy           |
|    |                 | Raghu KC                                                                                                                                      | 2014 | Lappeenranta University of Technology, Master thesis               | Master thesis    | Finland         |
|    |                 | Karlsson H                                                                                                                                    | 2012 | Norwegian University of Life Science                               | Master thesis    | Norway          |
| 22 | Egg plant       | Audsley E, Brander M, Chatterton J, Murphy-Bokern D, Webster C, Williams A                                                                    | 2009 | WWF-UK                                                             | Report           | United Kingdom  |
| 23 | Spinach         | Kramer KJ, Moll HC, Nonhebel S                                                                                                                | 1999 | Agriculture, ecosystem and Environment                             | Scientific paper | The Netherlands |
| 24 | Tomatoes        | Cellura M , Ardente F, Longo S                                                                                                                | 2012 | Journal of Environmental Management                                | Scientific paper | Italy           |
|    |                 | Theurl MC, Haberl H, Erb KH, Lindenthal T                                                                                                     | 2014 | Agronomy for Sustainable Development                               | Scientific paper | Italy           |
| 25 | Canned tomatoes | Castaldi S, Fidaleo M, Moresi M, Valentini R                                                                                                  | 2009 | University of Tuscia. Italy                                        | Report           | Italy           |
|    |                 | Manfredi M, Vignali G                                                                                                                         | 2014 | Journal of Cleaner Production                                      | Scientific paper | Italy           |
| 26 | Pepper          | Cellura M , Ardente F, Longo S                                                                                                                | 2012 | Journal of Environmental Management                                | Scientific paper | Italy           |
| 27 | Cucumber        | Audsley E, Brander M, Chatterton J, Murphy-Bokern D, Webster C, Williams A                                                                    | 2009 | World Wildlife Fund (WWF) and Food Climate research network WWF-UK | Report           | United Kingdom  |
|    |                 | Raab M, Brunklaus B                                                                                                                           | 2012 | Chalmers University of Technology                                  | Scientific paper | Spain           |
| 28 | Asparagus       | Soode E, Lampert P, Weber-Blaschke G, Richter K                                                                                               | 2014 | Journal of Cleaner Production                                      | Scientific paper | Germany         |
|    |                 | Blanke M, Schaefer F                                                                                                                          | 2012 | University of Bonn                                                 | Lecture          | Germany         |
| 29 | Pumpkin         | Blanke M, Schaefer F                                                                                                                          | 2012 | University of Bonn                                                 | Lecture          | Germany         |

|           |                  |                                                                                          |      |                                                                    |                  |                   |
|-----------|------------------|------------------------------------------------------------------------------------------|------|--------------------------------------------------------------------|------------------|-------------------|
| <b>30</b> | <b>Courgette</b> | Castaldi S, Fidaleo M, Moresi M, Valentini R                                             | 2009 | University of Tuscia. Italy                                        | Report           | Italy             |
|           |                  | Cellura M , Ardente F, Longo S                                                           | 2012 | Journal of Environmental Management                                | Scientific paper | Italy             |
| <b>31</b> | <b>Broccolo</b>  | Edwards J, Plassmann EJ, Hounsome Y, Mila i Canals J                                     | 2008 | Environmental Science & Policy.                                    | Scientific paper | United Kingdom    |
|           |                  | DEFRA                                                                                    | 2014 | T H Clements's Carbon Footprinting Challenge                       | Report           | United Kingdom    |
| <b>32</b> | <b>Artichoke</b> | Lo Giudice A, Mbohwa C, Clasadonte MT, Ingrao C                                          | 2014 | International Journal of Environmental Research                    | Scientific paper | Italy             |
| <b>33</b> | <b>Mushroom</b>  | Audsley E, Brander M, Chatterton J, Murphy-Bokern D, Webster C, Williams A               | 2009 | World Wildlife Fund (WWF) and Food Climate research network WWF-UK | Report           | United Kingdom    |
| <b>34</b> | <b>Onion</b>     | Fogelberg C, Carlsson-Kanyama A                                                          | 2006 | Swedish Defence Agency                                             | Report           | Sweden            |
|           |                  | O'Halloran, Fisher and Rab                                                               | 2008 | Horticulture Australia Limited (HAL)                               | Conference paper | Australia         |
|           |                  | Fogelberg C, CarlssonKanyama A                                                           | 2006 | Swedish Defence Agency                                             | Report           | Denmark<br>Sweden |
|           |                  | Saunders C, Barber A, Taylor G                                                           | 2006 | Lincoln University                                                 | Report           | United Kingdom    |
| <b>35</b> | <b>Potatoes</b>  | Carlsson-Kanyama A                                                                       | 1998 | Food Policy                                                        | Scientific paper | Sweden            |
|           |                  | Ecoinvent Centre                                                                         | 2013 | Swiss Centre for Life Cycle Inventories                            | Report           | Switzerland       |
|           |                  | Kramer KJ, Moll HC, Nonhebel S                                                           | 1999 | Agriculture Ecosystem & Environment                                | Scientific paper | The Netherlands   |
|           |                  | Röös E, Sundberg C, Hansson PA                                                           | 2010 | International Journal of Life Cycle Assessment                     | Scientific paper | United Kingdom    |
| <b>36</b> | <b>Orange</b>    | Pergola M, D'Amico M, Celano G, Palese AM, Scuderi A, Di Vita G, Pappalardo G, Inglese P | 2013 | Journal of Environmental Management                                | Scientific paper | Italy             |
|           |                  | Castaldi S, Fidaleo M, Moresi M, Valentini R.                                            | 2009 | University of Tuscia. Italy                                        | Report           | Italy             |
| <b>37</b> | <b>Lemon</b>     | Pergola M, D'Amico M, Celano G, Palese AM, Scuderi A, Di Vita G, Pappalardo G, Inglese P | 2013 | Journal of Environmental Management                                | Scientific paper | Italy             |
|           |                  | Castaldi S, Fidaleo M, Moresi M, Valentini R                                             | 2009 | University of Tuscia. Italy                                        | Report           | Italy             |

|           |                   |                                                                                   |      |                                                                                                  |                  |                |
|-----------|-------------------|-----------------------------------------------------------------------------------|------|--------------------------------------------------------------------------------------------------|------------------|----------------|
| <b>38</b> | <b>Mandarin</b>   | Castaldi S, Fidaleo M, Moresi M, Valentini R                                      | 2009 | University of Tuscia. Italy                                                                      | Report           | Italy          |
| <b>39</b> | <b>Apple</b>      | Sessa F, Marino M, Montanaro G, Dal Piaz A, Zanotelli D, Mazzetto F, Tagliavini M | 2014 | Proceedings of the 9th International Conference on Life Cycle Assessment in the Agri-Food Sector | Conference paper | Italy          |
|           |                   | Castaldi S, Fidaleo M, Moresi M, Valentini R                                      | 2009 | University of Tuscia. Italy                                                                      | Report           | Italy          |
|           |                   | Tamburini E , Pedrini P , Marchetti MG , Fano EA and Castaldelli G.               | 2015 | Sustainability                                                                                   | Scientific paper | Italy          |
|           |                   | Cerutti AK, Bruun S, Donno D, Beccaro GL, Bounous G                               | 2013 | Journal of Cleaner Production                                                                    | Scientific paper | Italy          |
| <b>40</b> | <b>Pear</b>       | Castaldi S, Fidaleo M, Moresi M, Valentini R                                      | 2009 | University of Tuscia. Italy                                                                      | Report           | Italy          |
|           |                   | Tamburini E , Pedrini P , Marchetti MG , Fano EA, Castaldelli G                   | 2015 | Sustainability                                                                                   | Scientific paper | Italy          |
| <b>41</b> | <b>Peach</b>      | Castaldi S, Fidaleo M, Moresi M, Valentini R                                      | 2009 | University of Tuscia. Italy                                                                      | Report           | Italy          |
| <b>42</b> | <b>Apricot</b>    | Castaldi S, Fidaleo M, Moresi M, Valentini R                                      | 2009 | University of Tuscia. Italy                                                                      | Report           | Italy          |
| <b>43</b> | <b>Grapefruit</b> | Castaldi S, Fidaleo M, Moresi M, Valentini R                                      | 2009 | University of Tuscia. Italy                                                                      | Report           | Italy          |
| <b>44</b> | <b>Fig</b>        | National Footprint Account                                                        | 2008 | Global Footprint Network                                                                         | Report           | Italy          |
| <b>45</b> | <b>Strawberry</b> | REWE Group                                                                        | 2009 | Product Carbon Footprint                                                                         | Report           | Spain          |
|           |                   | Williams A, Pell E, Webb J, Moorhouse E, Audsley E                                | 2008 | Proceedings of the 6th International Conference on LCA in the Agri-Food Sector                   | Conference paper | Spain          |
|           |                   | Williams A, Pell E, Webb J, Moorhouse E, Audsley E                                | 2008 | Proceedings of the 6th International Conference on LCA in the Agri-Food Sector                   | Conference paper | United Kingdom |
|           |                   | Lillywhite R                                                                      | 2008 | University of Warwick. United Kingdom                                                            | Report           | United Kingdom |
| <b>46</b> | <b>Raspberry</b>  | Girgenti V, Peano C, Baudino C, Tecco N                                           | 2014 | Science of the Total Environment                                                                 | Scientific paper | Italy          |
| <b>47</b> | <b>Bluesberry</b> | Girgenti V, Peano C, Baudino C, Tecco N                                           | 2014 | Science of the Total Environment                                                                 | Scientific paper | Italy          |
| <b>48</b> | <b>Cherries</b>   | Castaldi S, Fidaleo M, Moresi M, Valentini R                                      | 2009 | University of Tuscia. Italy                                                                      | Report           | Italy          |
| <b>49</b> | <b>Melon</b>      | Castaldi S, Fidaleo M, Moresi M, Valentini R                                      | 2009 | University of Tuscia. Italy                                                                      | Report           | Italy          |

|    |                  |                                                                            |      |                                                                    |                  |                |
|----|------------------|----------------------------------------------------------------------------|------|--------------------------------------------------------------------|------------------|----------------|
| 50 | Kiwi             | Audsley E, Brander M, Chatterton J, Murphy-Bokern D, Webster C, Williams A | 2009 | World Wildlife Fund (WWF) and Food Climate research network WWF-UK | Report           | United Kingdom |
|    |                  | Robertson K, Garnham M, Symes W                                            | 2014 | Int J Life Cycle Asses                                             | Scientific paper | New Zeland     |
| 51 | Banana           | Audsley E, Brander M, Chatterton J, Murphy-Bokern D, Webster C, Williams A | 2009 | World Wildlife Fund (WWF) and Food Climate research network WWF-UK | Report           | United Kingdom |
|    |                  | Svanes E, Aronsson Anna KS                                                 | 2013 | The International Journal of Life Cycle Assessment                 | Scientific paper | Costa Rica     |
| 52 | Avocado          | Audsley E, Brander M, Chatterton J, Murphy-Bokern D, Webster C, Williams A | 2009 | World Wildlife Fund (WWF) and Food Climate research network WWF-UK | Report           | United Kingdom |
| 53 | Pineapple        | Moss R                                                                     | 2011 | West Africa Fair Fruit (WAFF)                                      | Report           | Ghana          |
|    |                  | Audsley E, Brander M, Chatterton J, Murphy-Bokern D, Webster C, Williams A | 2009 | World Wildlife Fund (WWF) and Food Climate research network WWF-UK | Report           | United Kingdom |
| 54 | Walnut, hazelnut | Volpe R, Messineo S, Volpe M, Messineo A.                                  | 2015 | Sustainability                                                     | Scientific paper | Italy          |
|    |                  | National Footprint Account                                                 | 2008 | Global Footprint Network                                           | Report           | Italy          |
| 55 | Olive            | Rinaldi S, Barbanera M, Lascaro E                                          | 2014 | Science of the total Environment                                   | Scientific paper | Italy          |
|    |                  | De Gennaro B, Notarnicola B, Roselli L                                     | 2012 | Journal of Cleaner Production                                      | Scientific paper | Italy          |
| 56 | Beef             | Coderoni S, Sonaglia L                                                     | 2014 | MiPAAF-INEA                                                        | National report  | Italy          |
|    |                  | Castaldi S, Fidaleo M, Moresi M, Valentini R                               | 2009 | University of Tuscia. Italy                                        | Report           | Italy          |
| 57 | Poultry          | Coderoni S, Sonaglia L                                                     | 2014 | MiPAAF-INEA                                                        | National report  | Italy          |
| 58 | Pork             | Coderoni S, Sonaglia L                                                     | 2014 | MiPAAF-INEA                                                        | National report  | Italy          |
| 59 | Lamb             | Jones AK, Jones DC, Cross P                                                | 2014 | Agricultural Systems                                               | Scientific paper | United Kingdom |
|    |                  | Jones AK, Jones DC, Cross P                                                | 2014 | Agricultural Systems                                               | Scientific paper | United Kingdom |
|    |                  | Jones AK, Jones DC, Cross P                                                | 2014 | Agricultural Systems                                               | Scientific paper | United Kingdom |

|    |                |                                                                                                       |      |                                                         |                     |                               |
|----|----------------|-------------------------------------------------------------------------------------------------------|------|---------------------------------------------------------|---------------------|-------------------------------|
| 60 | Horse          | Ferrari M, Sette S, Mistura L, Le Donne C, Piccinelli R, Buonocore P, Leclercq C                      | 2010 | Public Health Nutrition                                 | Conference abstract | Italy                         |
| 61 | Processed meat | BCNF                                                                                                  | 2013 | Double Pyramid                                          | Report              | Italy                         |
| 62 | Rabbit         | Ferrari M, Sette S, Mistura L, Le Donne C, Piccinelli R, Buonocore P, Leclercq C                      | 2010 | Public Health Nutrition                                 | Conference abstract | Italy                         |
| 63 | Soia           | Gonzalez A, Frostell A, Carlsson-Kanyama                                                              | 2011 | Food Policy                                             | Scientific paper    | United Kingdom                |
| 64 | Shrimps        | LCA Food Database                                                                                     | 2008 | <a href="http://www.lcafood.dk">www.lcafood.dk</a>      | Database            | Denmark                       |
| 65 | Mussels        | LCA Food Database                                                                                     | 2008 | <a href="http://www.lcafood.dk">www.lcafood.dk</a>      | Database            | Denmark                       |
| 66 | Small pelagics | Iribarren D, Vázquez-Rowe I, Hospido A, Moreira MT, Feijoo G.                                         | 2011 | Sci Total Environ                                       | Scientific paper    | Italy                         |
| 67 | Cod            | Smárason BÖ, Vidarsson JR, Þórðarson G, Magnúsdóttir L                                                | 2014 | Matis                                                   | Scientific paper    | United Kingdom from Iceland   |
|    |                | LCA Food Database                                                                                     | 2008 | <a href="http://www.lcafood.dk">www.lcafood.dk</a>      | Database            | Denmark                       |
| 68 | Salmon         | Ziegler F, Winther U, Hognes ES, Emanuelsson A, Sund V, Ellingsen H                                   | 2013 | Journal of Industrial Ecology                           | Scientific paper    | Norway to Paris               |
|    |                | LCA Food Database                                                                                     | 2008 | <a href="http://www.lcafood.dk">www.lcafood.dk</a>      | Database            | Denmark                       |
|    |                | Pelletier, N, Tyedmers P, Sonelsson U, Scholz A, Ziegler F, Flysjo A, Kruse S, Cancino B, Silverman H | 2009 | Environmental Science & Technology                      | Scientific report   | Chile, Canada, United Kingdom |
| 69 | Ground fish    | Castaldi S, Fidaleo M, Moresi M, Valentini R                                                          | 2009 | University of Tuscia. Italy                             | Report              | Italy                         |
| 70 | Cow milk       | Fantin V, Buttol P, Pergreff R, Masoni P                                                              | 2012 | Journal of Cleaner Production                           | Scientific paper    | Italy                         |
|    |                | Penati CA, Tamburini A, Bava L, Zucali M, Sandrucci A                                                 | 2013 | Journal of Animal Science                               | Scientific paper    | Italy                         |
|    |                | Bava L, Zucali M, Tamburini A, Guerci M, Sandrucci A                                                  | 2014 | Quaderni della Ricerca n. 163, Regione Lombardia, Italy | Scientific paper    | Italy                         |
|    |                | Guerci M, Bava L, Zucali M, Tamburini A, Sandrucci A                                                  | 2014 | Journal of Cleaner Production                           | Scientific paper    | Italy                         |

|    |                 |                                                                    |      |                                                                                                                                                                                                                                       |                  |                 |
|----|-----------------|--------------------------------------------------------------------|------|---------------------------------------------------------------------------------------------------------------------------------------------------------------------------------------------------------------------------------------|------------------|-----------------|
|    |                 | Guerci M, Bava L, Zucali M, Sandrucci A, Penati C, Tamburini A     | 2013 | Journal of Dairy Research                                                                                                                                                                                                             | Scientific paper | Italy           |
| 71 | Goat milk       | Kanyarushoki C, Fuchs F, van der Werf HMG                          | 2008 | Proceedings of the 6th International Conference on Life Cycle Assessment in the Agri-Food Sector                                                                                                                                      | Conference paper | France          |
|    |                 | Robertson K, Symes W, Garnham M                                    | 2015 | Journal of Dairy Science                                                                                                                                                                                                              | Scientific paper | New Zealand     |
| 72 | Powered milk    | Flysjö A                                                           | 2012 | Aarhus University, Denmark                                                                                                                                                                                                            | Scientific paper | Denmark         |
| 73 | Soya drink      | Blonk H, Kool A, Luske B, de Waart S                               | 2008 | Blonk Milieu Advies B.V.                                                                                                                                                                                                              | Scientific paper | The Netherlands |
|    |                 | Ogle SM, Del Grosso J, Adler PR, Parton WJ                         | 2009 | Lifecycle Carbon Footprint of Biofuels Workshop                                                                                                                                                                                       | Scientific paper | Finland         |
| 74 | Yogurt          | Vergé XP, Maxime D, Dyer JA, Desjardins RL, Arcand Y, Vanderzaag A | 2013 | Journal of Dairy Science                                                                                                                                                                                                              | Scientific paper | Canada          |
|    |                 | González-García S, Castanheira EG, Dias AC, Arrojal                | 2013 | International Journal of Life Cycle Assessment                                                                                                                                                                                        | Scientific paper | Portugal        |
| 75 | Seasoned cheese | National Footprint Account                                         | 2008 | Global Footprint Network                                                                                                                                                                                                              | Report           | Italy           |
| 76 | Sheep cheese    | Favilli A, Rizzi F, Iraldo F                                       | 2003 | Parallel 1a: Life Cycle 2 Inventory, Databases and Tools                                                                                                                                                                              | Conference paper | Italy           |
| 77 | Soft cheese     | Castaldi S, Fidaleo M, Moresi M, Valentini R                       | 2009 | University of Tuscia. Italy                                                                                                                                                                                                           | Report           | Italy           |
| 78 | Mozzarella      | Simonetto M, Mazzi A, Fedel A, Pieretto C, Scipioni A              | 2015 | Proceedings of the International conference on Life Cycle Assessment as reference methodology for assessing supply chains and supporting global sustainability challenge - LCA for "Feeding the planet and energy for life" EXPO 2015 | Conference paper | Italy           |
|    |                 | Granarolo, Registration number S-P 00128                           | 2014 | Environmental declaration                                                                                                                                                                                                             | Technical sheet  | Italy           |
| 79 | Swiss cheese    | Nenecek T, Schmid A, Alig M, Schnebli K, Vaihinger M               | 2011 | Proceeding of SETAC Europe 17th LCA Case Studies Symposium                                                                                                                                                                            | Conference paper | Switzerland     |



|    |                         |                                                       |      |                                                                                                                                                                                                                                       |                               |         |
|----|-------------------------|-------------------------------------------------------|------|---------------------------------------------------------------------------------------------------------------------------------------------------------------------------------------------------------------------------------------|-------------------------------|---------|
| 80 | Hard cheese             | Caseificio Caramsche So c. Coop                       | 2015 | Environmental declaration                                                                                                                                                                                                             | External Communication Report | Italy   |
|    |                         | Castaldi S, Fidaleo M, Moresi M, Valentini R          | 2009 | University of Tuscia. Italy                                                                                                                                                                                                           | Report                        | Italy   |
| 81 | Ricotta                 | Simonetto M, Mazzi A, Fedel A, Pieretto C, Scipioni A | 2015 | Proceedings of the International conference on Life Cycle Assessment as reference methodology for assessing supply chains and supporting global sustainability challenge - LCA for "Feeding the planet and energy for life" EXPO 2015 | Conference paper              | Italy   |
|    |                         | Castaldi S, Fidaleo M, Moresi M, Valentini R          | 2009 | University of Tuscia. Italy                                                                                                                                                                                                           | Report                        | Italy   |
| 82 | Olive oil               | Pattaraa C, Salomoneb R, Cichellia A                  | 2016 | Journal of Cleaner Production                                                                                                                                                                                                         | Scientific paper              | Italy   |
|    |                         | Castaldi S, Fidaleo M, Moresi M, Valentini R          | 2009 | University of Tuscia. Italy                                                                                                                                                                                                           | Report                        | Italy   |
| 83 | Vegetable mais oil      | Marchio Zucchi                                        | 2016 | Environmental declaration                                                                                                                                                                                                             | External Communication Report | Italy   |
| 84 | Vegetable soia oil      | Marchio Zucchi                                        | 2016 | Environmental declaration                                                                                                                                                                                                             | External Communication Report | Italy   |
| 85 | Vegetable sunflower oil | Marchio Zucchi                                        | 2016 | Environmental declaration                                                                                                                                                                                                             | External Communication Report | Italy   |
| 86 | Vegetable peanut oil    | Marchio Zucchi                                        | 2016 | Environmental declaration                                                                                                                                                                                                             | External Communication Report | Italy   |
| 87 | Butter                  | Castaldi S, Fidaleo M, Moresi M, Valentini R          | 2009 | University of Tuscia. Italy                                                                                                                                                                                                           | Report                        | Italy   |
| 88 | Cream                   | Flysjö A                                              | 2012 | Aarhus University. Denmark                                                                                                                                                                                                            | PhD thesis                    | Denmark |
| 89 | Ice cream               | Sammontana                                            | 2017 | Environmental declaration                                                                                                                                                                                                             | External Communication Report | Italy   |

|     |                |                                                                                     |      |                                                                         |                  |                |
|-----|----------------|-------------------------------------------------------------------------------------|------|-------------------------------------------------------------------------|------------------|----------------|
| 90  | Honey          | National Footprint Account                                                          | 2008 | Global Footprint Network                                                | Report           | Italy          |
| 91  | Chocolate      | National Footprint Account                                                          | 2008 | Global Footprint Network                                                | Report           | Italy          |
| 92  | Sugar          | Lapi G                                                                              | 2013 | Università Bocconi, Milan, Italy                                        | Conference paper | Italy          |
|     |                | Castaldi S, Fidaleo M, Moresi M, Valentini R                                        | 2009 | University of Tuscia. Italy                                             | Report           | Italy          |
| 93  | Eggs           | Taylor RC, Omed H, Edwards-Jones G.                                                 | 2014 | Poultry Science                                                         | Scientific paper | United Kingdom |
|     |                | Agri-food production in Alberta                                                     | 2014 | Alberta Agricultural and rural development                              | Report           | Canada         |
| 94  | Drinking water | Fantin V, Scalbi S, Masoni P                                                        | 2012 | VI Convegno della Rete Italiana LCA                                     | Conference paper | Italy          |
|     |                | Botto S                                                                             | 2007 | Proceedings Nature                                                      | Scientific paper | Italy          |
| 95  | Bottled water  | Fantin V, Scalbi S, Masoni P                                                        | 2012 | VI Convegno della Rete Italiana LCA                                     | Conference paper | Italy          |
|     |                | Botto S                                                                             | 2007 | Proceedings Nature                                                      | Scientific paper | Italy          |
| 96  | Coffee         | National Footprint Account                                                          | 2008 | Global Footprint Network                                                | Report           | Italy          |
| 97  | Tea            | Azapagic A                                                                          | 2013 | Impact Assessment and Policy Action National Multi-Stakeholder Workshop | Conference paper | Kenya          |
|     |                | AIT. Small and medium scale industries in Asia: energy and environmental tea sector | 2002 | Asian Institute of Technology                                           | Report           | Sri Lanka      |
|     |                | Toulos JL, Sebtosi AB                                                               | 2016 | Renewable and Sustainable Energy Reviews                                | Scientific paper | Malawian       |
| 98  | Orange juice   | Beccalia M, Celluraa M, Iudicelloa M, Mistret M                                     | 2010 | Journal of Environmental Management                                     | Scientific paper | Italy          |
| 99  | Coca-cola      | Carbon trust                                                                        | 2009 | Carbon trust                                                            | Technical sheet  | United Kingdom |
| 100 | Wine           | Bonamentea E, Scruccaa F, Rinaldia S, Mericoa MC, Asdrubalib F, Lamastra L          | 2016 | Science of The Total Environment                                        | Scientific paper | Italy          |
|     |                | Bosco S, Di Benedetti C, Galli M, Remorini D, Massai R, Bonari E                    | 2016 | Italian Journal of Agronomy                                             | Scientific paper | Italy          |
|     |                | National Footprint Account                                                          | 2008 | Global Footprint Network                                                | Report           | Italy          |
| 101 | Spirits        | Consulting LLC                                                                      | 2011 | Four Elements Seattle                                                   | Report           | USA            |

|            |             |                            |      |                          |        |       |
|------------|-------------|----------------------------|------|--------------------------|--------|-------|
| <b>102</b> | <b>Beer</b> | National Footprint Account | 2008 | Global Footprint Network | Report | Italy |
|------------|-------------|----------------------------|------|--------------------------|--------|-------|
